# Supplementary material for: Immunomodulatory Role of BLG-Derived Peptides Based on Simulated Gastrointestinal Digestion and DC-T Cell from Mice Allergic to Cow’s Milk
Source: MDPI journal article supplement (doi:10.3390/foods11101450), 2022-05-17

**Table S1.** The amino acid sequence information of BLG-derived digested products with a molecular weight below 10kDa by liquid phase mass spectrometry. pH1 signal column, the electrical signals of products simulated digested by adults. pH3 signal column, the electrical signals of products simulated digested by infants. BLG, beta-lactoglobulin.

| Protein | Sequence            | Mass    | Score  | pH1 signal | pH3 signal |
|---------|---------------------|---------|--------|------------|------------|
| BLG     | TPEVDDEALEKF        | 1391.65 | 172.74 | 0.00E+00   | 7.08E+06   |
| BLG     | VEELKPTPEGDLE       | 1454.71 | 148.62 | 1.49E+08   | 2.98E+08   |
| BLG     | YVEELKPTPEGD        | 1375.65 | 140.24 | 4.99E+07   | 5.34E+07   |
| BLG     | TPEVDDEALEKFDK      | 1634.77 | 133.48 | 4.50E+08   | 1.08E+09   |
| BLG     | TPEVDDEALEKFD       | 1506.67 | 132.97 | 0.00E+00   | 2.78E+06   |
| BLG     | YVEELKPTPEGDL       | 1488.73 | 131.69 | 1.35E+09   | 7.27E+08   |
| BLG     | TPEVDDEALEKFDKA     | 1705.80 | 127.18 | 6.53E+06   | 3.53E+07   |
| BLG     | VEELKPTPEGD         | 1212.59 | 123.67 | 0.00E+00   | 4.42E+07   |
| BLG     | SDISLLDAQSAPLRV     | 1583.85 | 118.52 | 4.64E+06   | 0.00E+00   |
| BLG     | IDALNENK            | 915.47  | 111.17 | 2.94E+07   | 3.46E+07   |
| BLG     | LDAQSAPLR           | 969.52  | 105.52 | 4.46E+06   | 8.00E+06   |
| BLG     | VLDTDYKK            | 980.52  | 105.14 | 1.37E+07   | 5.50E+07   |
| BLG     | KIDALNENKVL         | 1255.71 | 105.13 | 1.92E+08   | 2.86E+08   |
| BLG     | VEELKPTPEGDL        | 1325.67 | 104.24 | 8.02E+08   | 8.02E+08   |
| BLG     | EELKPTPEGDLE        | 1355.65 | 101.39 | 4.82E+06   | 1.38E+07   |
| BLG     | KIDALNENKVLVLDTDYKK | 2218.22 | 101.38 | 0.00E+00   | 3.94E+06   |
| BLG     | PEVDDEALEKFDK       | 1533.72 | 99.84  | 0.00E+00   | 4.83E+06   |
| BLG     | VRTPEVDDEALEKFDK    | 1889.94 | 99.75  | 2.43E+07   | 3.82E+07   |
| BLG     | EALEKFDK            | 978.50  | 99.14  | 2.11E+08   | 5.58E+07   |
| BLG     | ELKPTPEGDLEIL       | 1452.77 | 98.41  | 2.59E+06   | 3.38E+07   |
| BLG     | YVEELKPTPEGDLE      | 1617.78 | 98.34  | 3.90E+08   | 4.14E+08   |
| BLG     | FKIDALNENK          | 1190.63 | 97.73  | 7.65E+06   | 3.41E+07   |
| BLG     | IVTQTMKG            | 876.47  | 96.49  | 2.11E+07   | 3.18E+08   |
| BLG     | VEELKPTPEGDLEILLQ   | 1922.02 | 92.38  | 2.95E+06   | 7.06E+06   |
| BLG     | LIVTQTMK            | 932.54  | 91.32  | 1.79E+08   | 9.80E+07   |
| BLG     | SLLDAQSAPLRV        | 1268.71 | 90.69  | 7.09E+06   | 1.19E+07   |
| BLG     | DEALEKFDK           | 1093.53 | 90.15  | 2.44E+07   | 2.21E+07   |
| BLG     | VYVEELKPTPEGDLE     | 1716.85 | 89.51  | 0.00E+00   | 9.98E+06   |
| BLG     | KIDALNENKVLVLDTDYK  | 2090.13 | 89.34  | 2.06E+06   | 9.41E+06   |
| BLG     | TPEVDDEALEK         | 1244.58 | 89.30  | 3.31E+07   | 8.29E+05   |
| BLG     | EKTKIPAV            | 884.53  | 89.30  | 6.03E+07   | 8.72E+07   |
| BLG     | ELKPTPEGDLE         | 1226.60 | 89.17  | 1.40E+08   | 1.05E+08   |
| BLG     | LNENKVLV            | 927.54  | 88.37  | 0.00E+00   | 1.48E+07   |
| BLG     | KIDALNENKVLV        | 1354.78 | 87.83  | 2.51E+08   | 6.88E+07   |
| BLG     | LVLDTDYKK           | 1093.60 | 87.48  | 1.19E+07   | 3.57E+07   |
| BLG     | DAQSAPLRV           | 955.51  | 85.68  | 3.71E+07   | 1.65E+08   |
| BLG     | VYVEELKPTPEGDL      | 1587.80 | 85.54  | 0.00E+00   | 1.57E+07   |
| BLG     | NENKVLVLDTDYKK      | 1677.89 | 85.16  | 3.20E+06   | 7.26E+06   |
| BLG     | TPEVDDEAL           | 987.44  | 84.57  | 6.62E+07   | 1.18E+08   |

|     |                     |         |       |          |          |
|-----|---------------------|---------|-------|----------|----------|
| BLG | VRTPEVDD            | 929.45  | 84.50 | 1.57E+08 | 2.86E+07 |
| BLG | IIAEKTKIPAV         | 1181.74 | 82.26 | 4.48E+06 | 7.60E+06 |
| BLG | YVEELKPTPEGDLEI     | 1730.86 | 80.75 | 1.18E+06 | 1.01E+07 |
| BLG | VEELKPTPEGDLEILLQK  | 2050.12 | 80.46 | 0.00E+00 | 1.49E+07 |
| BLG | EELKPTPEGDL         | 1226.60 | 79.66 | 3.17E+07 | 3.83E+07 |
| BLG | VEELKPTPEGDLEI      | 1567.80 | 77.78 | 3.25E+06 | 1.27E+07 |
| BLG | VYVEELKPTPEGDLEIL   | 1943.01 | 77.75 | 0.00E+00 | 1.86E+07 |
| BLG | TPEVDDEA            | 874.36  | 76.85 | 3.79E+07 | 5.57E+07 |
| BLG | EALEKFDKA           | 1049.54 | 76.28 | 5.82E+06 | 7.08E+06 |
| BLG | KPTPEGDL            | 855.43  | 76.06 | 5.10E+07 | 0.00E+00 |
| BLG | KPTPEGDLE           | 984.48  | 74.46 | 0.00E+00 | 2.90E+07 |
| BLG | RVYVEELKPTPEGDL     | 1743.90 | 72.62 | 1.41E+07 | 1.12E+07 |
| BLG | VRTPEVDDEA          | 1129.53 | 72.32 | 1.01E+08 | 4.22E+07 |
| BLG | FKIDALNENKV         | 1289.70 | 72.29 | 0.00E+00 | 9.61E+06 |
| BLG | LVLDTDYK            | 965.51  | 71.69 | 1.51E+07 | 3.23E+07 |
| BLG | VLVLDTDYKK          | 1192.67 | 68.63 | 9.55E+07 | 1.77E+06 |
| BLG | VRTPEVDDEAL         | 1242.61 | 68.54 | 1.45E+08 | 7.17E+07 |
| BLG | NKVLVLDTDYK         | 1306.71 | 68.36 | 0.00E+00 | 4.71E+06 |
| BLG | LSFNPTQLEEQ         | 1304.62 | 67.39 | 5.02E+06 | 7.69E+06 |
| BLG | LDAQSAPLRV          | 1068.59 | 67.33 | 1.14E+08 | 2.11E+08 |
| BLG | KIDALNEN            | 915.47  | 66.50 | 1.49E+07 | 1.56E+07 |
| BLG | LIVTQTMKG           | 989.56  | 63.22 | 4.36E+07 | 9.32E+06 |
| BLG | VLVLDTDYKKY         | 1355.73 | 63.07 | 0.00E+00 | 3.52E+06 |
| BLG | ALEKFDKA            | 920.50  | 62.58 | 8.94E+06 | 0.00E+00 |
| BLG | VRTPEVDDE           | 1058.49 | 61.78 | 1.59E+08 | 3.44E+07 |
| BLG | KIDALNENK           | 1043.56 | 61.56 | 3.55E+08 | 3.51E+08 |
| BLG | VRTPEVDDEALE        | 1371.65 | 61.11 | 4.18E+06 | 2.86E+06 |
| BLG | SDISLLDAQ           | 960.48  | 60.89 | 1.82E+07 | 0.00E+00 |
| BLG | IDALNENKVLVLDTDYK   | 1962.03 | 60.49 | 0.00E+00 | 1.59E+06 |
| BLG | ELKPTPEGDLEI        | 1339.69 | 60.26 | 0.00E+00 | 4.58E+06 |
| BLG | TPEVDDEALE          | 1116.48 | 58.25 | 1.29E+06 | 7.83E+06 |
| BLG | FKIDALNE            | 948.49  | 56.92 | 2.20E+06 | 0.00E+00 |
| BLG | LKPTPEGDL           | 968.52  | 56.26 | 3.79E+08 | 4.01E+08 |
| BLG | IDALNENKVLV         | 1226.69 | 55.31 | 1.29E+07 | 9.15E+06 |
| BLG | NKVLVLDTDYKK        | 1434.81 | 55.26 | 1.75E+06 | 1.03E+07 |
| BLG | KIDALNENKV          | 1142.63 | 54.78 | 2.03E+08 | 8.06E+08 |
| BLG | YVEELKPTPEGDLEIL    | 1843.95 | 53.30 | 8.86E+06 | 3.94E+07 |
| BLG | ELKPTPEGDL          | 1097.56 | 52.58 | 5.75E+08 | 0.00E+00 |
| BLG | VLVLDTDYK           | 1064.58 | 52.58 | 5.87E+07 | 1.13E+08 |
| BLG | DALNENKV            | 901.45  | 51.86 | 0.00E+00 | 3.87E+06 |
| BLG | VEELKPTPEGDLEIL     | 1680.88 | 51.77 | 3.18E+07 | 1.28E+08 |
| BLG | YVEELKPTPEGDLEILLQK | 2213.18 | 47.68 | 1.02E+06 | 2.25E+06 |
| BLG | KPTPEGDLEIL         | 1210.64 | 45.83 | 0.00E+00 | 2.06E+07 |
| BLG | LDAQSAPL            | 813.42  | 45.68 | 3.54E+08 | 2.14E+08 |

|     |                    |         |       |          |          |
|-----|--------------------|---------|-------|----------|----------|
| BLG | RVYVEELKPTPEGDLE   | 1872.95 | 45.54 | 3.54E+06 | 9.96E+06 |
| BLG | GLDIQKVAGT         | 1000.56 | 45.16 | 0.00E+00 | 7.87E+06 |
| BLG | RVYVEELKPTPEGDLEIL | 2099.12 | 45.00 | 1.11E+06 | 3.52E+06 |
| BLG | NENKVLVLDTDY       | 1421.70 | 44.61 | 0.00E+00 | 9.07E+05 |
| BLG | SDISLLDAQSAPL      | 1328.68 | 43.68 | 9.38E+07 | 1.06E+08 |
| BLG | YVEELKPTPE         | 1203.60 | 43.31 | 0.00E+00 | 1.30E+06 |
| BLG | GLDIQKVAGTW        | 1186.63 | 39.79 | 4.21E+06 | 5.33E+06 |
| BLG | ASDISLLDAQSAPL     | 1399.72 | 39.73 | 0.00E+00 | 9.45E+06 |
| BLG | VEELKPTPE          | 1040.54 | 36.59 | 0.00E+00 | 1.59E+06 |
| BLG | FKIDALNENKVL       | 1402.78 | 35.66 | 0.00E+00 | 2.01E+06 |
| BLG | SLLDAQSAPLR        | 1169.64 | 34.96 | 0.00E+00 | 1.60E+06 |
| BLG | ISLLDAQSAPLRV      | 1381.79 | 32.93 | 2.05E+05 | 2.77E+05 |
| BLG | LIVTQTMKGLDIQK     | 1586.91 | 31.68 | 2.20E+06 | 0.00E+00 |
| BLG | GLDIQKVAGTWY       | 1349.70 | 31.35 | 0.00E+00 | 1.21E+06 |
| BLG | LIVTQTMKGLDIQ      | 1458.81 | 31.22 | 8.74E+05 | 0.00E+00 |
| BLG | LKPTPEGDLEI        | 1210.64 | 30.89 | 0.00E+00 | 3.90E+06 |
| BLG | LKPTPEGDLE         | 1097.56 | 30.61 | 1.12E+08 | 1.65E+08 |
| BLG | MAASDISLLDAQSAPL   | 1601.80 | 28.81 | 0.00E+00 | 1.85E+06 |
| BLG | RVYVEELKPTPEGD     | 1630.82 | 28.28 | 0.00E+00 | 2.16E+06 |
| BLG | ALNENKVL           | 899.51  | 27.74 | 0.00E+00 | 1.27E+06 |
| BLG | VEELKPTPEGDLEILL   | 1793.97 | 26.77 | 1.18E+06 | 3.73E+06 |
| BLG | YVEELKPTPEGDLEILLQ | 2085.09 | 24.48 | 0.00E+00 | 6.99E+05 |
| BLG | LKPTPEGDLEILLQ     | 1564.87 | 24.43 | 0.00E+00 | 6.35E+05 |
| BLG | MENSAEPEQSLA       | 1304.56 | 20.83 | 0.00E+00 | 2.08E+06 |
| BLG | RTPEVDDEA          | 1030.46 | 20.78 | 0.00E+00 | 1.19E+06 |
| BLG | DALNENKVLV         | 1113.60 | 20.21 | 0.00E+00 | 2.93E+06 |

**Figure S1.** The TEER value of the Caco-2 monolayers at each wells, as described in (A) the normal model without the IL-1 $\beta$ -induced inflammation model. (B) The inflammation model with the application of IL-1 $\beta$  (final concentration was 10 ng/mL). TEER, trans-epithelial electrical resistance.

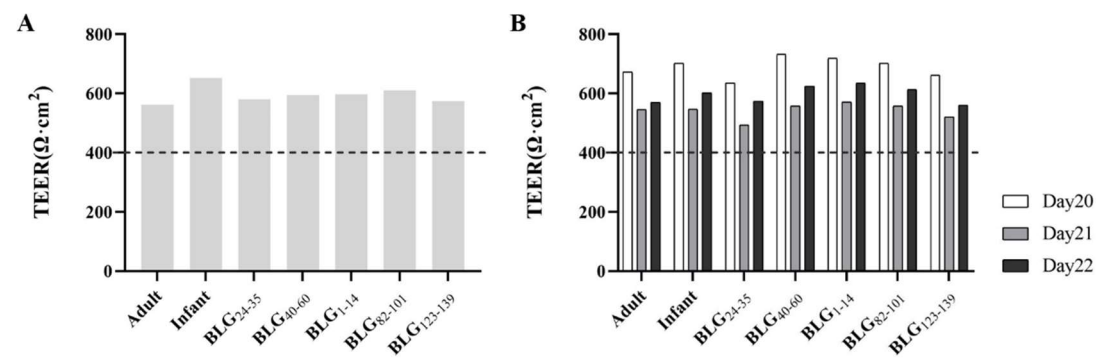

**Figure S2** The percentages of MLN- CD4<sup>+</sup> T cells after magnetic sorting: positive cells (A) and negative cells (B).

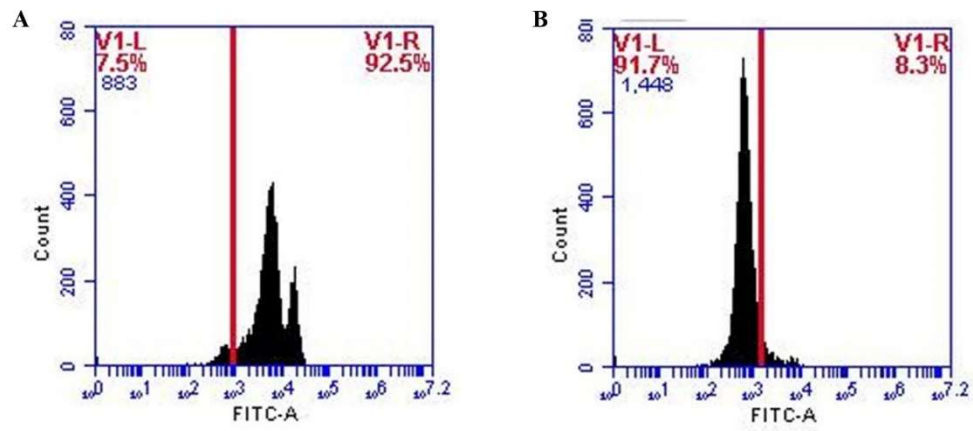

Supplement: s1 [file s1]
